# Supplementary material
Source: PubMed Central journal article supplement (PMC3138692)
Supplement: supp_blood-2010-07-296921_Document1.pdf [file supp_blood-2010-07-296921_Document1.pdf]

**Table S1. Clinical data on the PV patients included in cell/biochemical studies**

| <b>Patients</b> | <b>JAK2V617F</b> | <b>Age</b> | <b>WBC/mL</b> | <b>Hbg/dL</b> | <b>Hct %</b> | <b>Plt/mL</b> | <b>Duration (months)</b> | <b>Therapy</b>            |
|-----------------|------------------|------------|---------------|---------------|--------------|---------------|--------------------------|---------------------------|
| PV220705        | <b>Hetero</b>    | 79/F       | 8400          | 17.3          | 56.0         | 335           | 0                        | Phlebotomy+CHT            |
| PV569           | <b>Hetero</b>    | 28/M       | 8700          | 20.8          | 61.9         | 358           | 0                        | Unknown                   |
| PV583           | <b>Hetero</b>    | 60/M       | 13100         | 17.2          | 52.5         | 832           | 8                        | CHT                       |
| PV653           | <b>Hetero</b>    | 72/M       | 8000          | 18.4          | 59.2         | 676           | 0                        | Unknown                   |
| PV766           | <b>Hetero</b>    | 67/M       | 7100          | 15.2          | 52.2         | 493           | 0                        | CHT                       |
| PV842           | <b>Hetero</b>    | 51/M       | 10300         | 16.8          | 54.3         | 573           | 0                        | Phlebotomy                |
| PV870           | <b>Hetero</b>    | 62/F       | 9300          | 17.6          | 53.6         | 448           | 0                        | Phlebotomy                |
| PV904           | <b>Hetero</b>    | 70/M       | 10810         | 18.4          | 56.8         | 866           | 1                        | CHT                       |
| PV909           | <b>Hetero</b>    | 58/M       | 7170          | 16.8          | 53.6         | 578           | 90                       | Phlebotomy                |
| PV190705        | <b>Hetero</b>    | 65/F       | 5800          | 15.4          | 44.4         | 259           | 134                      | CHT                       |
| PV1             | <b>Hetero</b>    | 67/M       | 13700         | 12.5          | 39.6         | 859           | 48                       | HU,Bus,Anagrel,Phlebotomy |
| PV3             | <b>Hetero</b>    | 42/F       | 11000         | 15.8          | 46.3         | 560           | 60                       | HU or Phlebotomy          |
| PV4             | <b>Hetero</b>    | 58/M       | 7800          | 15.2          | 49.2         | 364           | 48                       | Phlebotomy                |
| PV538           | <b>Homo</b>      | 77/F       | 16600         | 13.9          | 46.0         | 306           | 65                       | CHT                       |
| PV546           | <b>Homo</b>      | 74/F       | 9300          | 16.5          | 56.8         | 425           | 2                        | Phlebotomy + CHT          |
| PV5             | <b>Homo</b>      | 60/M       | 21900         | 14.4          | 47.3         | 862           | 180                      | HU and Phlebotomy         |

Abbreviations: Anagrel=anagrelide, BUS=busulfan, CHT=not otherwise specified chemotherapy, Hb=hemoglobin, Hct= hematocrit, HU=hydroxyurea,Plt= Platelets, WBC=white blood cells; 0=new or recent diagnosis.

**Table S2. Frequency of erythroid (CD235<sup>pos</sup>) and non-erythroid (CD45<sup>pos</sup>) cells generated in cultures of MNC from ND or PV patients in the presence (+) or not (-) of DXM, as indicated.**

|                               |        | CD45 <sup>pos</sup> |           | CD235 <sup>pos</sup> |            |
|-------------------------------|--------|---------------------|-----------|----------------------|------------|
|                               |        | -DXM                | +DXM      | -DXM                 | +DXM       |
| <b>ND</b><br>(n=5)            | Day 11 | 38.6±17.0           | 8.2±1.3 * | 57.4±16.0            | 87.2±4.6 * |
|                               | Day 13 | 37.8±21.0           | 7.0±2.6 * | 55.7±19.0            | 86.0±7.1 * |
| <b>Heterozygous</b><br>(n=10) | Day 11 | 8.0±10.0 §          | 1.6±0.9 § | 90.1±11.0 §          | 96.6±2.6 § |
|                               | Day 13 | 12.1±17.0 §         | 1.3±1.0 § | 85.0±18.0 §          | 95.6±2.7 § |
| <b>Homozygous</b><br>(n=3)    | Day 11 | 4.0±2.8 §           | 2.1±1.8 § | 93.6±3.0 §           | 95.3±3.2 § |
|                               | Day 13 | 4.3±3.7 §           | 0.8±1.1 § | 90.6±6.0 §           | 95.0±2.4   |

Values statistically different (p<.05) from those observed in the corresponding group from ND (§) or from the parallel cultures without DXM (\*) are indicated. Representative FACS analyses are presented in Figure S2.

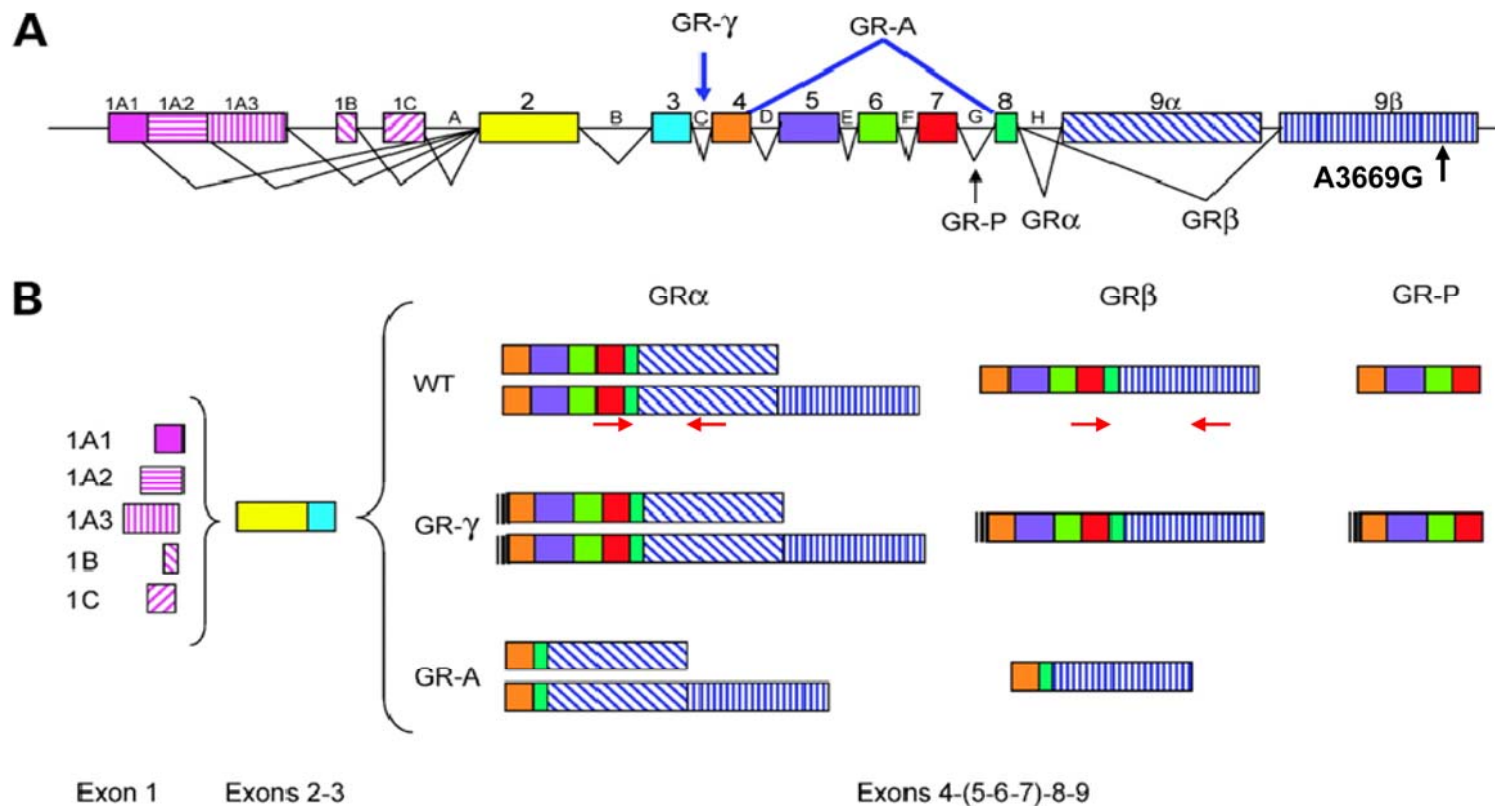

**Figure S1. Diagram of the human *GR* locus and schematic representation of examples of alternative splicing sites (A) and *GR* isoforms (B) expressed in the population.** The presence of the A3669G polymorphism gives rise to an alternative splicing at exon 9 which results in a mRNA encoding the dominant negative  $\beta$  isoform. Red arrows indicate the positions of the oligos used for RT-PCR determination of GR $\alpha$  and  $\beta$  isoform expression (from Sanchez-Vega B et al, Mol Cancer Ther. 2006;5:3062-3070.)

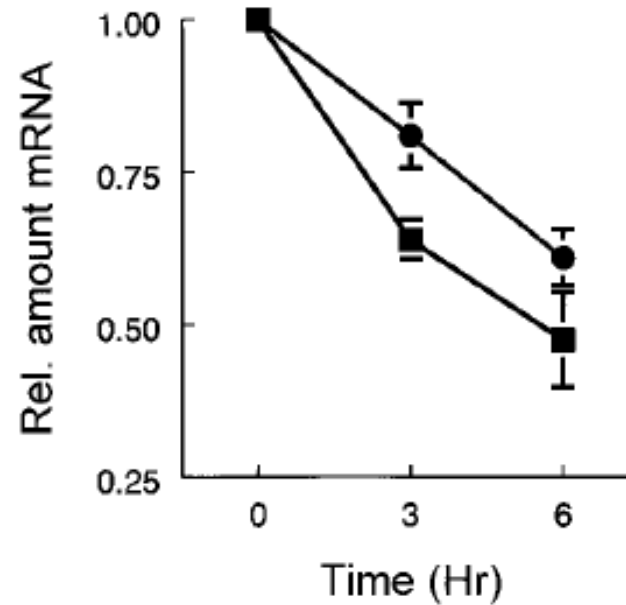

**Figure S2.** Half-life of A3669G positive (circles) and A3669G negative (squares) GR $\beta$  mRNA in COS-1 cells transfected with the expression plasmid pCMVGR $\beta$  (squares), or vector pCM $\beta$ mut, which contains a mutated “ATTTA motif” (to GTTTA”) in the 3’ UTR (circles). At 3 and 6 h after actinomycin-D treatment, the cells transfected with pCMVGR $\beta$  show a significantly ( $p < 0.05$ ) larger decrease in GR $\beta$  mRNA levels than the cells transfected with the mutated vector. Data are expressed as mean ( $n = 3$ )  $\pm$  SEM. Published by permission from Dr. Derijk and the editor of Journal of Rheumatology (see Derijk et al J Rheumatol 2001; 28:2383 for further details).

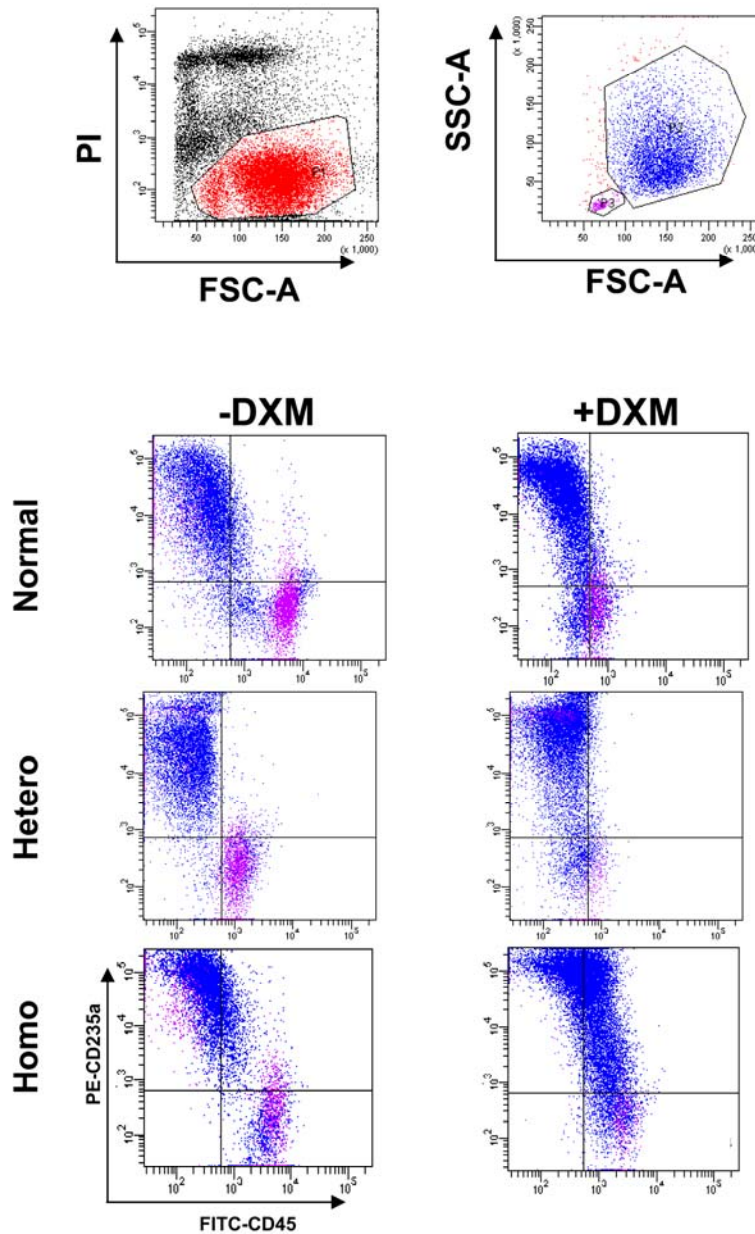

**Figure S3. Representative FACS analysis for CD45 and CD235a expression of cells obtained after 13 days in cultures of MNC from ND and from patients with PV, as indicated.** The cultures, the same as represented in Figure 2B, were stimulated with GFs with or without DXM. The mean ( $\pm$ SD) frequencies of CD45<sup>pos</sup> and CD235a<sup>pos</sup> cells observed in multiple experiments for each donor type are summarized in Table SII. Since the frequency of Propidium Iodide<sup>pos</sup> cells was comparable ( $\sim$ 10-15%) in all cultures analyzed, the propidium iodide (PI) staining and FSC and SSC analyses of only one representative experiment are presented, as reference. Cultured cells were divided by FSC/SSC analyses into small lymphocyte-sized cells (purple dots) and large erythroblast-size cells (blue dots). This color code is retained in the CD45/CD235a analyses to allow comparison of size distribution of cells obtained in the different cultures.

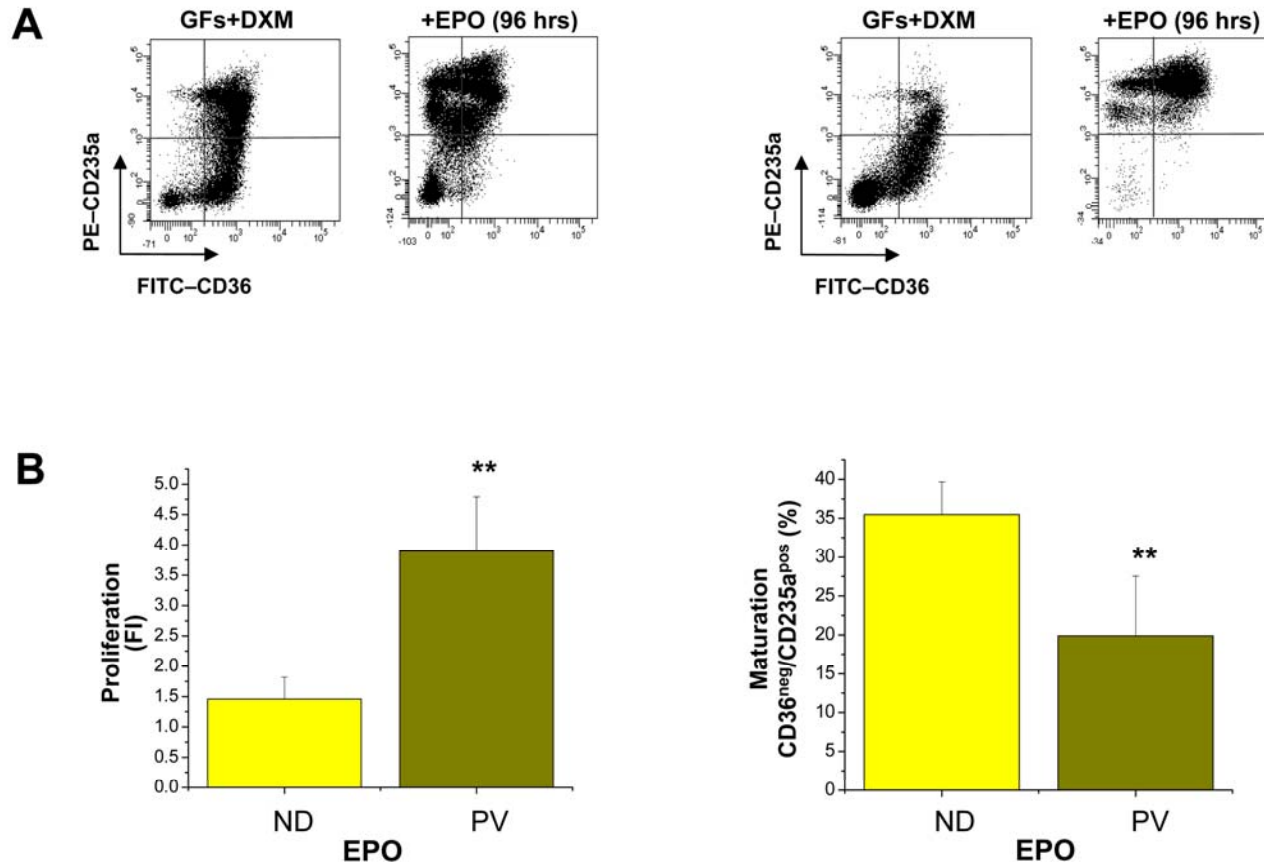

**Figure S4. EPO alone induces proliferation and not maturation of EBs generated *ex-vivo* from PV patients.** A) Representative FACS analyses for CD36 and CD235a expression of EBs obtained from ND (left panels) and PV patients (right panels) under HEMA conditions (GFs+DXM) and stimulated for 96 hrs with EPO (10 U/mL). B) Mean ( $\pm$ SD) fold increase (FI) in cell number and in the frequency of mature (CD36<sup>neg</sup>CD235a<sup>high</sup>) EBs observed in cultures of 3 separate ND and PV patients after 4 days with EPO alone.

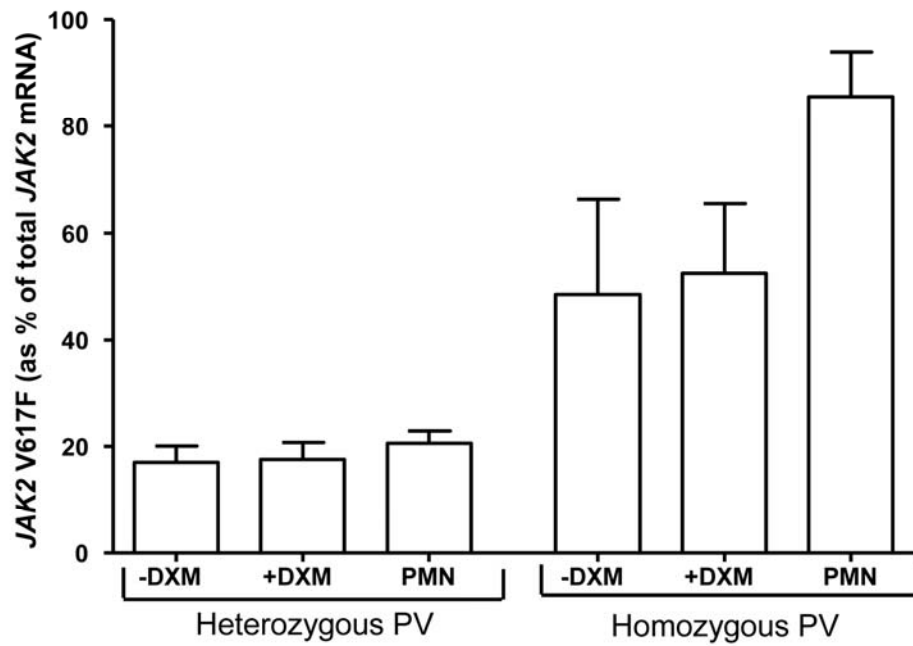

**Figure S5. *JAK2V617F* expression, as percent of wild type allele expression, in erythroid cells obtained in vitro with (+) or without (-) DXM from PV MNC heterozygous or homozygous for the *JAK2V617F* mutation.** Results are compared with the percent of *JAK2V617F* expressed by granulocytes (PMN) present in the blood of the patients at the time of collection for this study.
